# Supplementary material for: Rapid, in situ synthesis of ultra-small silicon particles for boosted lithium storage capability through ultrafast Joule heating
Source: Royal Society of Chemistry journal article supplement (doi:10.1039/d3nr04794f), 2023-12-21
Supplement: d3nr04794f1.pdf [file d3nr04794f1.pdf]

***Supporting Information***

**Rapid, in situ Synthesis of Ultra-Small Silicon Particles for Boosted Lithium Storage Capability through Ultrafast Joule Heating**

Shigang Liu <sup>a,b,1</sup>, Bowen Liu <sup>b,c,1</sup>, Ming Liu <sup>b,c</sup>, Junjie Xiong <sup>b,c</sup>, Yang Gao <sup>b,c,\*</sup>, Bin Wang <sup>b,c,\*</sup>, Yingcheng Hu <sup>a,\*</sup>

<sup>a</sup> *Key Laboratory of Bio-based Material Science and Technology of Ministry of Education, Engineering Research Center of Advanced Wooden Materials of Ministry of Education, College of Material Science and Engineering, Northeast Forestry University, Harbin 150040, China*

<sup>b</sup> *CAS Key Laboratory of Nanosystem and Hierarchical Fabrication, National Center for Nanoscience and Technology, Beijing 100190, China*

<sup>c</sup> *University of Chinese Academy of Sciences, Beijing 100049, China*

\* Corresponding authors.

*E-mail addresses:* [yingchenghu@nefu.edu.cn](mailto:yingchenghu@nefu.edu.cn) (Y. Hu), [gaoyang@nanoctr.cn](mailto:gaoyang@nanoctr.cn) (Y. Gao), [wangb@nanoctr.cn](mailto:wangb@nanoctr.cn) (B. Wang).

<sup>1</sup> These authors contributed equally to this work.

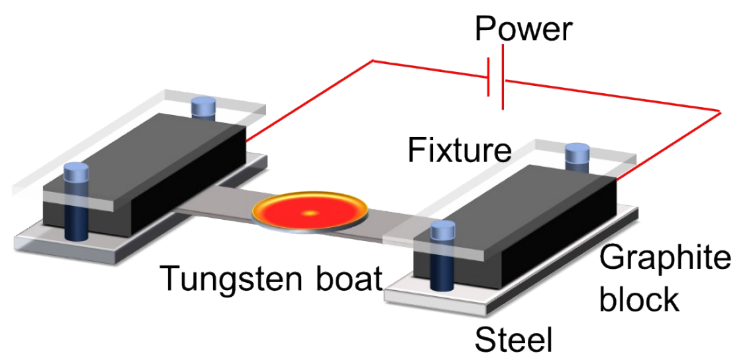

**Figure S1.** Schematic diagram illustrating the process of us-Si/C preparation utilizing a FJH apparatus.

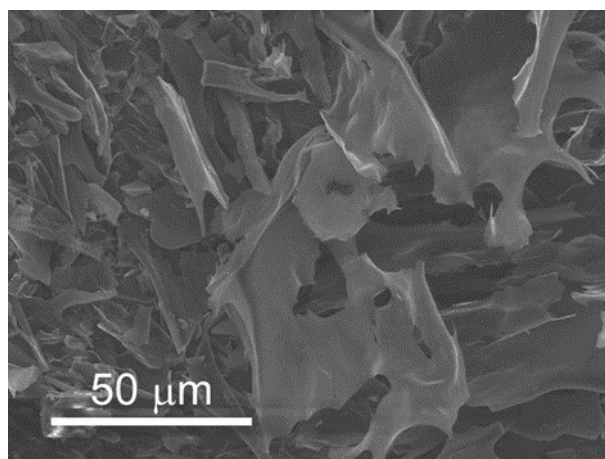

**Figure S2.** SEM image of CNCs, indicating that CNCs are freeze-dried and self-assembled into large scale nanosheet structures.

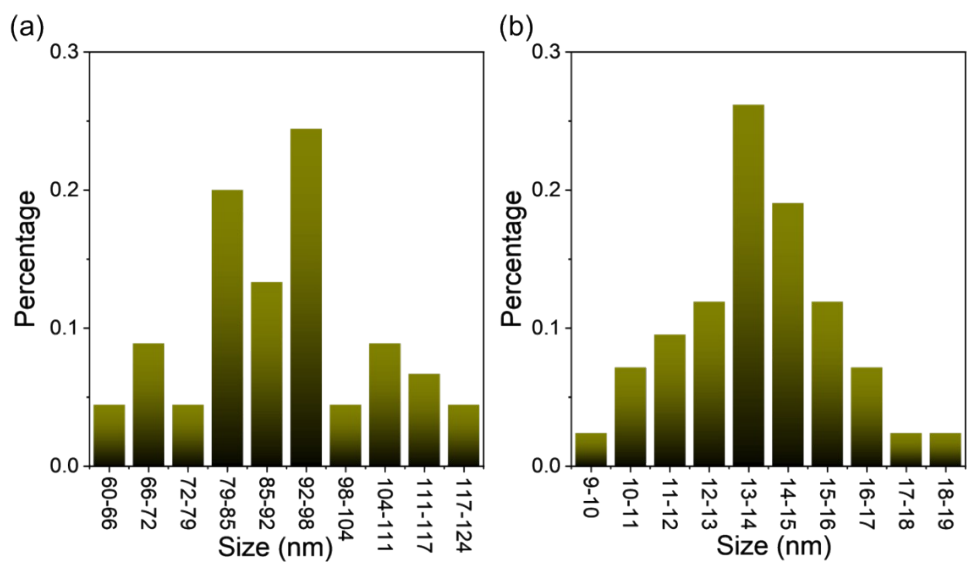

**Figure S3.** The size distribution of SiNPs in (a) Si/C and (b) us-Si/C.

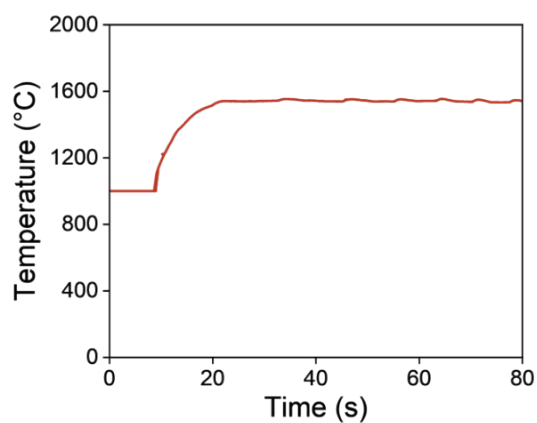

**Figure S4.** Temperature profile and stabilization trend of the FJH process.

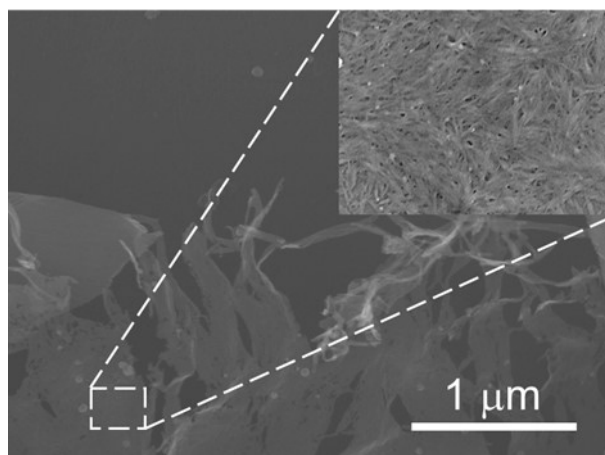

**Figure S5.** SEM image of carbon nanosheets derived from assembled CNCs.

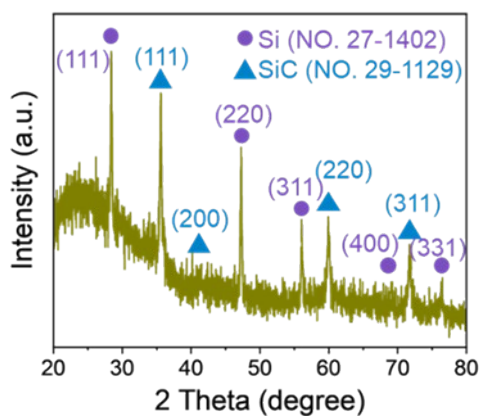

**Figure S6.** XRD pattern of the Si/C sample after continuous heating at 1700 °C for 50

s.

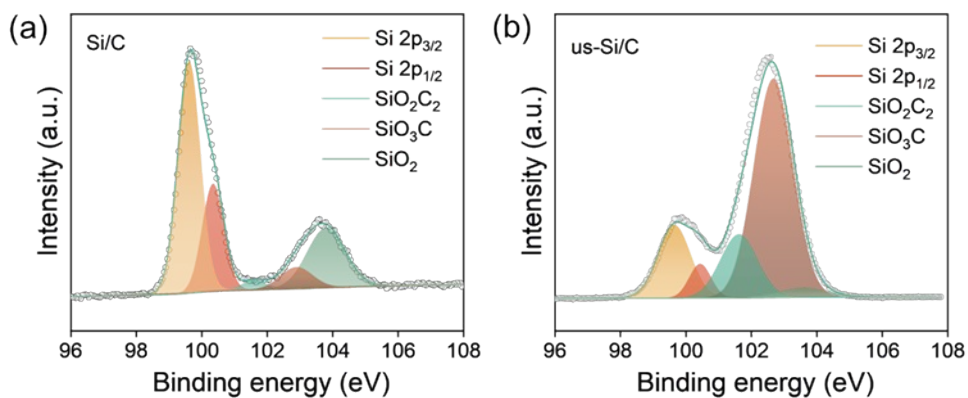

**Figure S7.** The high-resolution Si 2p XPS spectra of (a) Si/C and (b) us-Si/C.

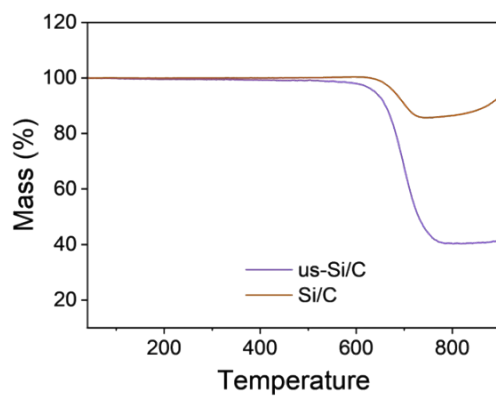

**Figure S8.** TG analysis of Si/C and us-Si/C under air condition.

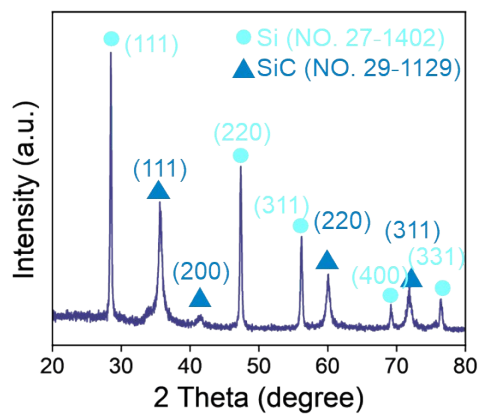

**Figure S9.** XRD pattern of the Si/C sample after being heated to 1200 °C for 3 h during CVD.

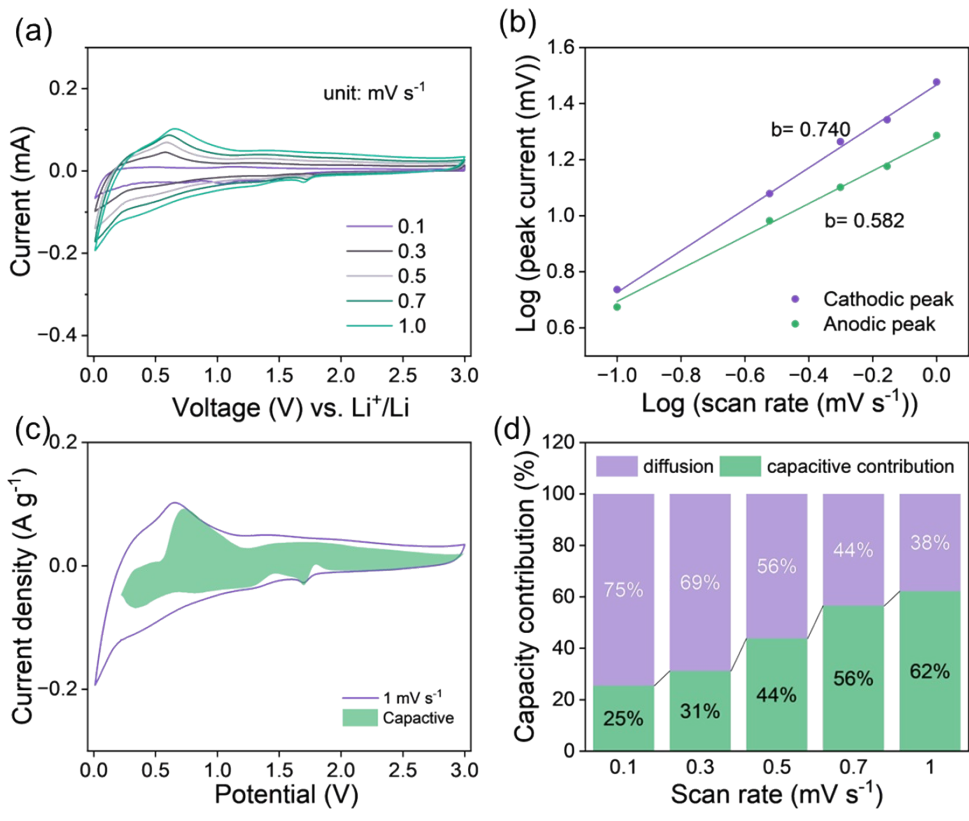

**Figure S10.** (a) CV curves of Si/C at different scan rates. (b) Logarithm of peak current vs. logarithm of scan rate. (c) Capacitive contribution to charge storage collected at 1.0 mV s<sup>-1</sup>. (d) Capacitive and diffusion-controlled contribution to the total capacity at scan rates from 0.1 to 1.0 mV s<sup>-1</sup>.

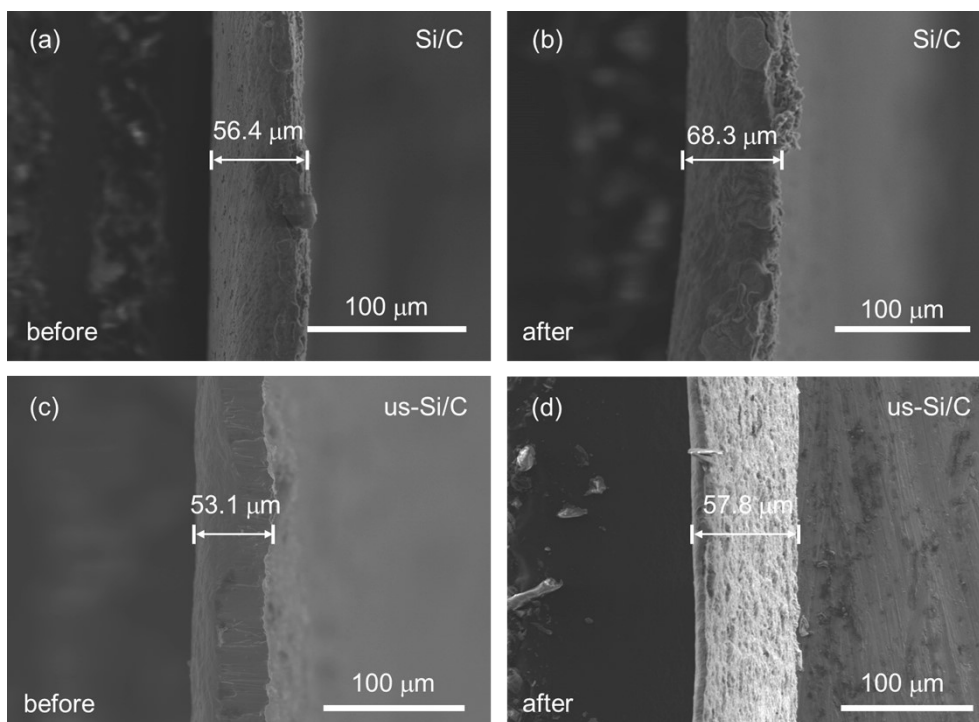

**Figure S11.** Cross-sectional morphology of (a) Si/C and (c) us-Si/C electrodes at the initial state. Cross-sectional morphology of (b) Si/C and (d) us-Si/C electrodes after 200 cycles.

**Table S1.** Electrochemical lithium storage properties of various Si/rGO composite electrode materials reported.

| Materials                         | Si particle size | Voltage window (V) | Current density (mA g <sup>-1</sup> ) | Capacity (mAh g <sup>-1</sup> )/cycle numbers | Ref. |
|-----------------------------------|------------------|--------------------|---------------------------------------|-----------------------------------------------|------|
| Si/graphite                       | 0.5 μm           | 0.01-1.5           | 1 mA cm <sup>-2</sup>                 | 0.909 mAh cm <sup>-2</sup> /50                | [1]  |
| Nano-Si/graphite/carbon composite | 100 nm           | 0.01-1.5           | 100                                   | 700/50                                        | [2]  |
| G/Si NP pellet                    | 60 nm            | 0.01-1.5           | 0.5 C                                 | 3 mAh cm <sup>-2</sup> /50                    | [3]  |
| Si/rGO core-shell                 | 12 μm            | 0.01-1             | 1000                                  | 1258/300                                      | [4]  |
| Mesoporous Si/C                   | 50 nm            | 0.01-2             | 100                                   | 617/100                                       | [5]  |
| Si/DDAC/N-GNS                     | 80 nm            | 0.01-1             | 2000                                  | 1168/100                                      | [6]  |
| 3D Si/G                           | 50 nm            | 0.1-1              | 200                                   | 1909/100                                      | [7]  |
| Porous yin-yang hybrid            | 200 nm           | 0.01-1.5           | 3000                                  | 800/600                                       | [8]  |
| Spherical Si/G                    | 2.5 μm           | 0.01-2             | 1000                                  | 722/50                                        | [9]  |
| Si/G/C nanofibers                 | 200 nm           | 0.1-1.5            | 3000                                  | 900/200                                       | [10] |
| Si/G-bubble film                  | 50 nm            | 0.01-1             | 100                                   | 998/1000                                      | [11] |
| G/Si nanowires array              | 50 nm            | 0.01-1.5           | 2000                                  | 684/1000                                      | [12] |
| Walnut Si@Gra@Pc                  | 125 nm           | 0.01-1             | 300                                   | 450/1000                                      | [13] |
| Alternating rGO/Si/ rGO           | 85 nm            | 0.01-1             | 1500                                  | 1849/200                                      | [14] |
| Freestanding rGO/Si film          | ~500 nm          | 0.01-1.25          | 1000                                  | 713/200                                       | [15] |
| Porous 3D G/Si/G sandwich         | ~7 nm            | 0.01-1             | 600                                   | 360/194                                       | [16] |
| This work                         | ~15 nm           | 0.01-1             | 2000                                  | 918/1000                                      |      |



## Reference

- [1] S.S. Hwang, C.G. Cho, H. Kim, *Electrochim. Acta*, 55 (2010) 3236-3239.
- [2] L. Takacs, *Prog. Mater. Sci.*, 47 (2002) 355-414.
- [3] I.H. Son, J. Hwan Park, S. Kwon, et al., *Nat. Commun.*, 6 (2015) 7393.
- [4] W. Zhai, Q. Ai, L. Chen, et al., *Nano Res.*, 10 (2017) 4274-4283.
- [5] Z. Xiao, N. Xia, L. Song, et al., *Ionics*, 26 (2020) 589-599.
- [6] R. Ruffo, S.S. Hong, C.K. Chan, et al., *J. Phys. Chem. C*, 113 (2009) 11390-11398.
- [7] M.-S. Wang, G.-L. Wang, S. Wang, et al., *Chem. Eng. J.*, 356 (2019) 895-903.
- [8] Y. Jin, Y. Tan, X. Hu, et al., *ACS Appl. Mater. Interfaces*, 9 (2017) 15388-15393.
- [9] M. Su, S. Liu, L. Tao, et al., *J. Electroanal. Chem.*, 844 (2019) 86-90.
- [10] L. Fei, B.P. Williams, S.H. Yoo, et al., *ACS Appl. Mater. Interfaces*, 8 (2016) 5243-5250.
- [11] Y. Shi, Z. Wu, L. Du, et al., *J. Mater. Sci. Mater. Electron.*, 29 (2018) 4526-4532.
- [12] F. Miao, R. Miao, W. Wu, et al., *Mater. Lett.*, 228 (2018) 262-265.
- [13] X. Ding, W. Yao, J. Zhu, et al., *BioMed Res. Int*, 2020 (2020) 6173618.
- [14] B. Deng, R. Xu, X. Wang, et al., *Energy Stor. Mater.*, 22 (2019) 450-460.
- [15] X. Cai, W. Liu, Z. Zhao, et al., *ACS Appl. Mater. Interfaces*, 11 (2019) 3897-3908.
- [16] Z. Feng, C. Huang, A. Fu, et al., *Thin Solid Films*, 693 (2020) 137702.
